# Supplementary material for: The genetic diversity and structure of the Haflinger horse population in the Czech Republic
Source: Copernicus journal article supplement (doi:10.5194/aab-67-323-2024), 2024-07-04
Supplement: Supplementary file [file aab-67-323-2024-supplement.pdf]

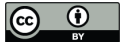

*Supplement of*

## **The genetic diversity and structure of the Haflinger horse population in the Czech Republic**

**Michaela Kulišťáková et al.**

*Correspondence to:* Tomáš Urban (urban@mendelu.cz)

The copyright of individual parts of the supplement might differ from the article licence.

**Table S1.** Diversity characteristics of individual microsatellites in Austrian subpopulation

| <b>AUT</b>   | <b>N</b> | <b>A</b> | <b>Ar</b> | <b>H<sub>o</sub></b> | <b>H<sub>e</sub></b> | <b>HWE</b> | <b>F<sub>is</sub></b> | <b>PIC</b> |
|--------------|----------|----------|-----------|----------------------|----------------------|------------|-----------------------|------------|
| <b>AHT4</b>  | 59       | 7        | 3.79      | 0.86                 | 0.75                 | 0.144      | -0.157                | 0.699      |
| <b>AHT5</b>  | 58       | 7        | 4.17      | 0.79                 | 0.77                 | 0.495      | -0.030                | 0.717      |
| <b>HMS1</b>  | 49       | 5        | 2.4       | 0.65                 | 0.57                 | 0.841      | -0.153                | 0.472      |
| <b>HMS2</b>  | 58       | 7        | 3.57      | 0.71                 | 0.71                 | 0.990      | 0.003                 | 0.652      |
| <b>HMS3</b>  | 59       | 6        | 3.81      | 0.80                 | 0.71                 | 0.968      | -0.129                | 0.649      |
| <b>HMS6</b>  | 59       | 5        | 3.06      | 0.71                 | 0.65                 | 0.803      | -0.090                | 0.574      |
| <b>HMS7</b>  | 59       | 5        | 3.22      | 0.58                 | 0.70                 | 0.663      | 0.171                 | 0.620      |
| <b>HTG4</b>  | 58       | 6        | 3.04      | 0.59                 | 0.65                 | 0.122      | 0.101                 | 0.546      |
| <b>HTG6</b>  | 58       | 5        | 1.59      | 0.17                 | 0.16                 | 1.000      | -0.070                | 0.057      |
| <b>HTG7</b>  | 58       | 5        | 3.22      | 0.67                 | 0.66                 | 0.991      | -0.022                | 0.586      |
| <b>HTG10</b> | 58       | 7        | 3.88      | 0.81                 | 0.75                 | 0.661      | -0.076                | 0.695      |
| <b>VHL20</b> | 58       | 9        | 4.78      | 0.84                 | 0.84                 | 1.000      | -0.003                | 0.817      |
| <b>ASB2</b>  | 55       | 6        | 3.47      | 0.84                 | 0.73                 | 0.694      | -0.152                | 0.667      |
| <b>ASB17</b> | 46       | 9        | 4.04      | 0.89                 | 0.81                 | 0.917      | -0.105                | 0.781      |
| <b>ASB23</b> | 46       | 7        | 3.51      | 0.80                 | 0.74                 | 0.992      | -0.087                | 0.645      |
| <b>CA425</b> | 40       | 5        | 2.82      | 0.65                 | 0.70                 | 0.979      | 0.070                 | 0.646      |

**Table S2.** Diversity characteristics of individual microsatellites in Czech subpopulation

| <b>CZE</b>   | <b>N</b> | <b>A</b> | <b>Ar</b> | <b>H<sub>o</sub></b> | <b>H<sub>e</sub></b> | <b>HWE</b> | <b>F<sub>is</sub></b> | <b>PIC</b> |
|--------------|----------|----------|-----------|----------------------|----------------------|------------|-----------------------|------------|
| <b>AHT4</b>  | 359      | 6        | 3.82      | 0.74                 | 0.75                 | 0.795      | 0.021                 | 0.711      |
| <b>AHT5</b>  | 358      | 8        | 3.75      | 0.79                 | 0.73                 | 0.670      | -0.083                | 0.680      |
| <b>HMS1</b>  | 355      | 5        | 2.23      | 0.54                 | 0.52                 | 0.369      | -0.026                | 0.419      |
| <b>HMS2</b>  | 359      | 8        | 3.72      | 0.78                 | 0.73                 | 0.634      | -0.073                | 0.685      |
| <b>HMS3</b>  | 359      | 9        | 4.02      | 0.79                 | 0.72                 | 0.361      | -0.093                | 0.675      |
| <b>HMS6</b>  | 359      | 5        | 3.37      | 0.70                 | 0.69                 | 0.232      | -0.017                | 0.633      |
| <b>HMS7</b>  | 359      | 7        | 3.46      | 0.70                 | 0.72                 | 1.000      | 0.028                 | 0.664      |
| <b>HTG4</b>  | 359      | 6        | 3.00      | 0.61                 | 0.62                 | 0.905      | 0.020                 | 0.554      |
| <b>HTG6</b>  | 359      | 5        | 1.70      | 0.18                 | 0.17                 | 0.917      | -0.055                | 0.168      |
| <b>HTG7</b>  | 359      | 5        | 3.10      | 0.63                 | 0.61                 | 0.987      | -0.021                | 0.560      |
| <b>HTG10</b> | 359      | 8        | 3.63      | 0.72                 | 0.70                 | 0.959      | -0.035                | 0.640      |
| <b>VHL20</b> | 359      | 9        | 4.74      | 0.85                 | 0.84                 | 0.998      | -0.017                | 0.814      |
| <b>ASB2</b>  | 355      | 8        | 3.66      | 0.79                 | 0.73                 | 0.528      | -0.074                | 0.682      |
| <b>ASB17</b> | 342      | 12       | 4.24      | 0.82                 | 0.78                 | 0.456      | -0.053                | 0.755      |
| <b>ASB23</b> | 342      | 11       | 4.00      | 0.81                 | 0.77                 | 0.001      | -0.059                | 0.721      |
| <b>CA425</b> | 342      | 5        | 3.37      | 0.73                 | 0.71                 | 0.989      | -0.034                | 0.652      |

**Table S3.** Diversity characteristics of individual microsatellites in Germany subpopulation

| <b>GER</b>   | <b>N</b> | <b>A</b> | <b>Ar</b> | <b>H<sub>o</sub></b> | <b>H<sub>e</sub></b> | <b>HWE</b> | <b>F<sub>is</sub></b> | <b>PIC</b> |
|--------------|----------|----------|-----------|----------------------|----------------------|------------|-----------------------|------------|
| <b>AHT4</b>  | 17       | 6        | 4.00      | 0.88                 | 0.78                 | 1.000      | -0.136                | 0.741      |
| <b>AHT5</b>  | 17       | 6        | 3.17      | 0.65                 | 0.55                 | 1.000      | -0.172                | 0.527      |
| <b>HMS1</b>  | 17       | 4        | 2.74      | 0.65                 | 0.60                 | 1.000      | -0.075                | 0.520      |
| <b>HMS2</b>  | 17       | 5        | 3.33      | 0.65                 | 0.70                 | 0.119      | 0.070                 | 0.643      |
| <b>HMS3</b>  | 17       | 6        | 3.61      | 0.65                 | 0.73                 | 0.294      | 0.118                 | 0.690      |
| <b>HMS6</b>  | 17       | 4        | 2.93      | 0.71                 | 0.63                 | 0.364      | -0.118                | 0.567      |
| <b>HMS7</b>  | 17       | 5        | 3.18      | 0.59                 | 0.69                 | 0.477      | 0.144                 | 0.628      |
| <b>HTG4</b>  | 17       | 5        | 2.82      | 0.65                 | 0.58                 | 0.031      | -0.120                | 0.508      |
| <b>HTG6</b>  | 17       | 3        | 1.44      | 0.12                 | 0.11                 | 1.000      | -0.046                | 0.109      |
| <b>HTG7</b>  | 17       | 5        | 3.40      | 0.71                 | 0.67                 | 0.425      | -0.057                | 0.608      |
| <b>HTG10</b> | 17       | 6        | 4.10      | 0.76                 | 0.79                 | 0.999      | 0.026                 | 0.755      |
| <b>VHL20</b> | 17       | 8        | 4.70      | 0.82                 | 0.83                 | 1.000      | 0.010                 | 0.812      |
| <b>ASB2</b>  | 17       | 5        | 3.52      | 0.65                 | 0.74                 | 0.576      | 0.128                 | 0.698      |
| <b>ASB17</b> | 10       | 6        | 2.93      | 0.70                 | 0.79                 | 0.315      | 0.114                 | 0.759      |
| <b>ASB23</b> | 10       | 6        | 3.17      | 1.00                 | 0.77                 | 0.075      | -0.299                | 0.708      |
| <b>CA425</b> | 10       | 5        | 2.74      | 0.80                 | 0.73                 | 0.295      | -0.103                | 0.674      |

**Table S4.** Diversity characteristics of individual microsatellites in Italian subpopulation

| <b>ITA</b>   | <b>N</b> | <b>A</b> | <b>Ar</b> | <b>H<sub>o</sub></b> | <b>H<sub>e</sub></b> | <b>HWE</b> | <b>F<sub>is</sub></b> | <b>PIC</b> |
|--------------|----------|----------|-----------|----------------------|----------------------|------------|-----------------------|------------|
| <b>AHT4</b>  | 4        | 4        | 3.27      | 0.75                 | 0.66                 | 0.330      | -0.143                | 0.605      |
| <b>AHT5</b>  | 4        | 5        | 3.96      | 1.00                 | 0.75                 | 0.000      | -0.333                | 0.671      |
| <b>HMS1</b>  | 4        | 2        | 1.93      | 0.50                 | 0.38                 | 1.000      | -0.333                | 0.305      |
| <b>HMS2</b>  | 4        | 5        | 3.87      | 0.75                 | 0.75                 | 0.000      | 0.000                 | 0.712      |
| <b>HMS3</b>  | 4        | 4        | 3.28      | 0.75                 | 0.66                 | 0.326      | -0.143                | 0.605      |
| <b>HMS6</b>  | 4        | 4        | 3.26      | 0.75                 | 0.66                 | 0.339      | -0.143                | 0.536      |
| <b>HMS7</b>  | 4        | 4        | 3.01      | 0.50                 | 0.66                 | 0.322      | 0.238                 | 0.536      |
| <b>HTG4</b>  | 4        | 3        | 2.92      | 1.00                 | 0.66                 | 1.000      | -0.524                | 0.582      |
| <b>HTG6</b>  | 4        | 1        | 1.00      | 0.00                 | 0.00                 | -          | -                     | 0.000      |
| <b>HTG7</b>  | 4        | 2        | 2.00      | 1.00                 | 0.50                 | 0.318      | -1.000                | 0.375      |
| <b>HTG10</b> | 4        | 6        | 4.32      | 0.75                 | 0.78                 | 0.000      | 0.040                 | 0.754      |
| <b>VHL20</b> | 4        | 6        | 4.29      | 0.75                 | 0.81                 | 0.000      | 0.0767                | 0.786      |
| <b>ASB2</b>  | 4        | 5        | 3.92      | 1.00                 | 0.75                 | 0.000      | -0.333                | 0.671      |
| <b>ASB17</b> | 4        | 5        | 3.64      | 0.50                 | 0.75                 | 0.000      | 0.333                 | 0.712      |
| <b>ASB23</b> | 4        | 4        | 3.26      | 0.75                 | 0.66                 | 0.000      | -0.143                | 0.346      |
| <b>CA425</b> | 4        | 5        | 3.89      | 0.75                 | 0.78                 | 1.000      | 0.040                 | 0.671      |

**Table S5.** Diversity characteristics of individual microsatellites in Slovak subpopulation

| <b>SVK</b>   | <b>N</b> | <b>A</b> | <b>Ar</b> | <b>H<sub>o</sub></b> | <b>H<sub>e</sub></b> | <b>HWE</b> | <b>F<sub>is</sub></b> | <b>PIC</b> |
|--------------|----------|----------|-----------|----------------------|----------------------|------------|-----------------------|------------|
| <b>AHT4</b>  | 4        | 2        | 2.00      | 0.50                 | 0.5                  | 1.000      | 0.000                 | 0.375      |
| <b>AHT5</b>  | 4        | 3        | 2.35      | 0.50                 | 0.41                 | 1.000      | -0.231                | 0.371      |
| <b>HMS1</b>  | 4        | 2        | 1.93      | 0.50                 | 0.38                 | 1.000      | -0.333                | 0.305      |
| <b>HMS2</b>  | 4        | 4        | 3.28      | 0.75                 | 0.66                 | 0.359      | -0.143                | 0.605      |
| <b>HMS3</b>  | 4        | 4        | 3.03      | 0.75                 | 0.56                 | 1.000      | -0.333                | 0.524      |
| <b>HMS6</b>  | 4        | 2        | 1.93      | 0.25                 | 0.47                 | 0.335      | 0.467                 | 0.359      |
| <b>HMS7</b>  | 4        | 4        | 3.53      | 1.00                 | 0.72                 | 1.000      | -0.391                | 0.593      |
| <b>HTG4</b>  | 4        | 3        | 2.66      | 0.75                 | 0.59                 | 0.313      | -0.263                | 0.346      |
| <b>HTG6</b>  | 4        | 2        | 1.67      | 0.25                 | 0.22                 | 1.000      | -0.143                | 0.000      |
| <b>HTG7</b>  | 4        | 3        | 2.93      | 1.00                 | 0.66                 | 1.000      | -0.524                | 0.581      |
| <b>HTG10</b> | 3        | 4        | 3.00      | 0.67                 | 0.67                 | 0.000      | 0.000                 | 0.305      |
| <b>VHL20</b> | 4        | 4        | 3.26      | 0.75                 | 0.66                 | 0.000      | -0.143                | 0.605      |
| <b>ASB2</b>  | 4        | 4        | 3.29      | 1.00                 | 0.66                 | 0.311      | -0.524                | 0.605      |
| <b>ASB17</b> | 4        | 5        | 4.16      | 1.00                 | 0.78                 | 1.000      | -0.280                | 0.746      |
| <b>ASB23</b> | 4        | 4        | 3.54      | 1.00                 | 0.72                 | 1.000      | -0.391                | 0.593      |
| <b>CA425</b> | 4        | 3        | 2.88      | 0.75                 | 0.62                 | 1.000      | -0.200                | 0.555      |
